# Supplementary material for: Synthesis, Characterization and Physicochemical Properties of Biogenic Silver Nanoparticle-Encapsulated Chitosan Bionanocomposites
Source: MDPI journal article supplement (doi:10.3390/polym14030463), 2022-01-24
Supplement: s1 [file s1]

Article

# Synthesis, Characterization and Physicochemical Properties of Biogenic Silver Nanoparticle-Encapsulated Chitosan Bionanocomposites

Sreelekha Ediyilyam<sup>1</sup>, Mahesh M. L<sup>1</sup>, Bini George<sup>1\*</sup>, Sarojini Sharath Shankar<sup>2,3\*</sup>, Stanisław Waclawek<sup>4</sup>, Miroslav Černík<sup>4\*</sup> and Vinod VelloraThekkae Padil<sup>4\*</sup>

<sup>1</sup> Department of Chemistry, School of Physical Sciences, Central University of Kerala, Kerala, Kasaragod, Pin-671316, India; sreelekha.e469@gmail.com (S.E.); maheshml127@gmail.com (M.M.L.)

<sup>2</sup> Department of Biochemistry and Molecular Biology, School of Biological Sciences, Central University of Kerala, Kerala, Kasaragod, Pin-671316, India

<sup>3</sup> Department of Medicine, Thomas Jefferson University, Jefferson Alumni Hall, 1020 Locust Street, Philadelphia, PA19107, USA

<sup>4</sup> Institute for Nanomaterials, Advanced Technologies and Innovation (CXI), Technical University of Liberec (TUL), Studentská 1402/2, 461 17 Liberec, Czech Republic 1 461 17 Liberec, Czech Republic; stanislav.waclawek@tul.cz

\* Correspondence: binigeorgek@cukerala.ac.in (B.G.); sharathshankar82@gmail.com (S.S.); miroslav.cernik@tul.cz (M.Č.); vinod.padil@tul.cz (V.V.T.P.); Tel.: +420-723-372-911 (V.V.T.P.)

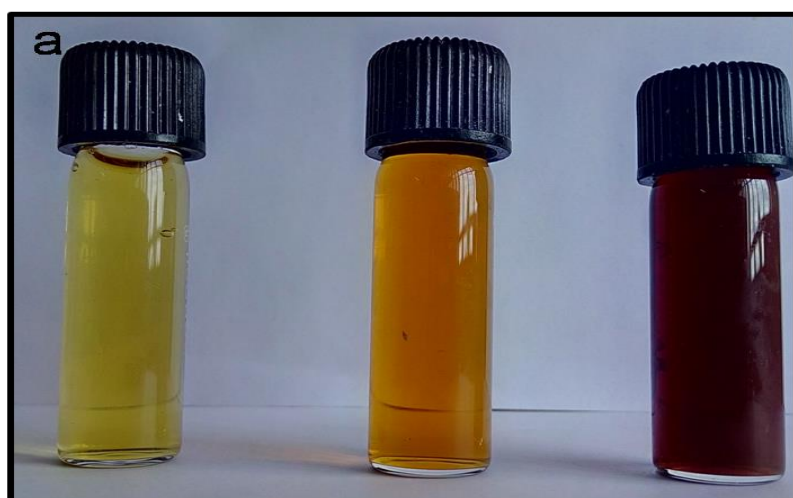

**Figure S1.** Green synthesized nanoparticles colour change observed from pale yellow to dark yellow then finally to reddish brown.

**Table S1.** Swelling degree of films.

| Films | EDS of Scaffolds |         |         |          |          |          |
|-------|------------------|---------|---------|----------|----------|----------|
|       | x                | y       | z       | Average  | SD       | SE       |
| C     | 1160.7           | 1178    | 1170    | 1169.567 | 8.658137 | 1.698837 |
| Cp    | 1327.65          | 1311    | 1326.9  | 1321.85  | 9.403856 | 1.770485 |
| Cps   | 1228.23          | 1237.87 | 1224.87 | 1230.323 | 6.748076 | 1.499786 |
| Cps1  | 1229.52          | 1245.45 | 1249.31 | 1241.427 | 10.49054 | 1.869986 |
| Cps2  | 1250.05          | 1259.78 | 1251.31 | 1253.713 | 5.291525 | 1.328097 |
| Cps3  | 1255.24          | 1263.98 | 1268.01 | 1262.41  | 6.528162 | 1.475145 |
| Cps4  | 1281.85          | 1271    | 1293    | 1281.95  | 11.00034 | 1.914884 |

SD- standard deviation, SE- Standard error.

**Table S2.** WVTR of films.

| Films | WVTR of Scaffolds |       |       |          |          |          |
|-------|-------------------|-------|-------|----------|----------|----------|
|       | x                 | y     | z     | Average  | SD       | SE       |
| C     | 60.51             | 61.02 | 60.76 | 60.76333 | 0.255016 | 0.291557 |
| Cp    | 68.74             | 68.04 | 67.89 | 68.22333 | 0.453689 | 0.388882 |
| Cps   | 67.65             | 67.51 | 68.09 | 67.75    | 0.302655 | 0.317624 |
| Cps1  | 68.87             | 68.92 | 69.72 | 69.17    | 0.47697  | 0.398735 |
| Cps2  | 69.76             | 69.43 | 69.01 | 69.4     | 0.375899 | 0.353977 |
| Cps3  | 71.74             | 70.98 | 71.9  | 71.54    | 0.491528 | 0.404775 |
| Cps4  | 75.68             | 75.88 | 76.21 | 75.92333 | 0.267644 | 0.298688 |

**Table S3.** MRC of Scaffolds.

| Films | MRC of Scaffolds |       |        |          |          |          |
|-------|------------------|-------|--------|----------|----------|----------|
|       | x                | y     | z      | Average  | SD       | SE       |
| C     | 95.27            | 95.44 | 95.69  | 95.46667 | 0.211266 | 0.265371 |
| Cp    | 97.3             | 97.39 | 97.64  | 97.44333 | 0.13167  | 0.2095   |
| Cps   | 96.92            | 96.9  | 97.46  | 97.09333 | 0.284436 | 0.307915 |
| Cps1  | 97.76            | 97.38 | 97.45  | 97.53    | 0.075056 | 0.158172 |
| Cps2  | 97.81            | 97.99 | 98.38  | 98.06    | 0.207926 | 0.263266 |
| Cps3  | 98.89            | 99.12 | 98.11  | 98.70667 | 0.507766 | 0.411406 |
| Cps4  | 99.21            | 99.84 | 95.035 | 98.02833 | 2.426596 | 0.899369 |

**Table S4.** Degradation in Hank's solution.

| Films | Hank's Degradation of Scaffolds |         |         |          |          |          |
|-------|---------------------------------|---------|---------|----------|----------|----------|
|       | x                               | y       | z       | Average  | SD       | SE       |
| C     | 926.12                          | 910.87  | 937.25  | 924.7467 | 13.24351 | 2.101072 |
| Cp    | 1698.2                          | 1688.42 | 1677.5  | 1688.04  | 10.35523 | 1.857887 |
| Cps   | 1542.69                         | 1563.01 | 1552.75 | 1552.817 | 10.16016 | 1.840305 |
| Cps1  | 1564.78                         | 1574.64 | 1563.21 | 1567.543 | 6.195824 | 1.437106 |
| Cps2  | 1568.56                         | 1579.41 | 1571.37 | 1573.113 | 5.631166 | 1.370057 |
| Cps3  | 1579.97                         | 1589    | 1594.97 | 1587.98  | 7.551841 | 1.586594 |
| Cps4  | 1598.2                          | 1623.3  | 1634.9  | 1618.8   | 18.75926 | 2.500618 |

**Table S5.** % of EAB of scaffolds.

| Films | % of EAB of Scaffolds |        |        |          |          |          |
|-------|-----------------------|--------|--------|----------|----------|----------|
|       | x                     | y      | z      | Average  | SD       | SE       |
| C     | 4.6272                | 4.987  | 5.879  | 5.1644   | 0.64448  | 0.463494 |
| Cp    | 17.9467               | 18.967 | 17.678 | 18.19723 | 0.680041 | 0.47611  |
| Cps   | 6.3994                | 6.998  | 7.456  | 6.951133 | 0.529857 | 0.420261 |
| Cps4  | 10.5161               | 10.789 | 10.999 | 10.76803 | 0.242132 | 0.284096 |

**Table S6.** Tensile strength (TS) of scaffolds

| Films | Tensile Strength of Scaffolds |        |        |          |          |          |
|-------|-------------------------------|--------|--------|----------|----------|----------|
|       | x                             | y      | z      | Average  | SD       | SE       |
| C     | 0.9586                        | 0.9284 | 0.9184 | 0.935133 | 0.020929 | 0.083524 |
| Cp    | 0.8981                        | 0.8145 | 0.8345 | 0.849033 | 0.043654 | 0.120629 |
| Cps   | 1.2218                        | 1.2645 | 1.2953 | 1.260533 | 0.03691  | 0.110921 |
| Cps4  | 0.63295                       | 0.7435 | 0.6543 | 0.676917 | 0.058643 | 0.139813 |
